# Supplementary material for: Efficacy and safety of one anastomosis gastric bypass versus Roux-en-Y gastric bypass for type 2 diabetes remission (ORDER): protocol of a multicentre, randomised controlled, open-label, superiority trial
Source: HighWire-hosted journal article supplement (doi:10.1136/bmjopen-2022-062206), 2022-09-01
Supplement: bmjopen-2022-062206supp001_data_supplement.pdf [file bmjopen-2022-062206supp001_data_supplement.pdf]

## World Health Organization Trial Registration Data Set

| Data category                                    | Information                                                                                                                                                                                                                                                                                                                                                                                                                                                                                                                                                                                                                                                                                                                                                                |
|--------------------------------------------------|----------------------------------------------------------------------------------------------------------------------------------------------------------------------------------------------------------------------------------------------------------------------------------------------------------------------------------------------------------------------------------------------------------------------------------------------------------------------------------------------------------------------------------------------------------------------------------------------------------------------------------------------------------------------------------------------------------------------------------------------------------------------------|
| 1. Primary Registry and Trial Identifying Number | ClinicalTrials.gov Identifier: NCT05015283                                                                                                                                                                                                                                                                                                                                                                                                                                                                                                                                                                                                                                                                                                                                 |
| 2. Date of Registration in Primary Registry      | 27 February 2022                                                                                                                                                                                                                                                                                                                                                                                                                                                                                                                                                                                                                                                                                                                                                           |
| 3. Secondary Identifying Numbers                 | None                                                                                                                                                                                                                                                                                                                                                                                                                                                                                                                                                                                                                                                                                                                                                                       |
| 4. Source(s) of Monetary or Material Support     | Beijing Municipal Science & Technology Commission (Z211100002921029), National Key Technologies R&D Program (2015BAI13B09), Beihune Charitable Foundation (DXWKYJ001), and Beijing Excellent Talents Training Funding Program (2018000021469G195)                                                                                                                                                                                                                                                                                                                                                                                                                                                                                                                          |
| 5. Primary Sponsor                               | Beijing Friendship Hospital, Capital Medical University                                                                                                                                                                                                                                                                                                                                                                                                                                                                                                                                                                                                                                                                                                                    |
| 6. Secondary Sponsor(s)                          | None                                                                                                                                                                                                                                                                                                                                                                                                                                                                                                                                                                                                                                                                                                                                                                       |
| 7. Contact for Public Queries                    | Peng Zhang                                                                                                                                                                                                                                                                                                                                                                                                                                                                                                                                                                                                                                                                                                                                                                 |
| 8. Contact for Scientific Queries                | Peng Zhang                                                                                                                                                                                                                                                                                                                                                                                                                                                                                                                                                                                                                                                                                                                                                                 |
| 9. Public Title                                  | Diabetes remission in obese subjects with type 2 diabetes after one anastomosis gastric bypass or Roux-en-Y gastric bypass: a multicenter, randomized controlled, open-label, superiority trial-ORDER trial                                                                                                                                                                                                                                                                                                                                                                                                                                                                                                                                                                |
| 10. Scientific Title                             | Efficacy and safety of one anastomosis gastric bypass versus Roux-en-Y gastric bypass for type 2 diabetes Remission (ORDER): protocol of a multicenter, randomized controlled, open-label, superiority trial                                                                                                                                                                                                                                                                                                                                                                                                                                                                                                                                                               |
| 11. Countries of Recruitment                     | China, or and Singapore                                                                                                                                                                                                                                                                                                                                                                                                                                                                                                                                                                                                                                                                                                                                                    |
| 12. Health Condition(s) or Problem(s) Studied    | Type 2 diabetes and obesity                                                                                                                                                                                                                                                                                                                                                                                                                                                                                                                                                                                                                                                                                                                                                |
| 13. Intervention(s)                              | one anastomosis gastric bypass and Roux-en-Y gastric bypass                                                                                                                                                                                                                                                                                                                                                                                                                                                                                                                                                                                                                                                                                                                |
| 14. Key Inclusion and Exclusion Criteria         | <p><b>Inclusion criteria</b></p> <ul style="list-style-type: none"> <li>① Age 21–65 years (both sexes)</li> <li>② BMI 27.5–50 kg/m<sup>2</sup></li> <li>③ Previously diagnosed T2D duration ≥6 months</li> <li>④ HbA1c ≥7.0%.</li> <li>⑤ Currently receiving oral/injectable antidiabetic medications [insulin/ Glucagon-like peptide-1 (GLP-1) receptor agonists]</li> <li>⑥ OAGB/RYGB recommended by a multidisciplinary team</li> </ul> <p><b>Exclusion criteria</b></p> <ul style="list-style-type: none"> <li>① Active gastrointestinal ulcer</li> <li>② Latent autoimmune diabetes in the adult or type 1 diabetes (Reviewer #1, comment #2)</li> <li>③ Current Helicobacter pylori infection</li> <li>④ Currently diagnosed with severe gastroesophageal</li> </ul> |

|                              |                                                                                                                                                                                                                                                                                                                                                                                                                                                                                                                                                                                                                                                                                                                                                                                                                                                                                                                                                                                                                                                                                                                                                                |
|------------------------------|----------------------------------------------------------------------------------------------------------------------------------------------------------------------------------------------------------------------------------------------------------------------------------------------------------------------------------------------------------------------------------------------------------------------------------------------------------------------------------------------------------------------------------------------------------------------------------------------------------------------------------------------------------------------------------------------------------------------------------------------------------------------------------------------------------------------------------------------------------------------------------------------------------------------------------------------------------------------------------------------------------------------------------------------------------------------------------------------------------------------------------------------------------------|
|                              | <p>reflux disease by esophagogastroduodenoscopy (EGD) defined as Los Angeles classification grade &gt;B or Barrett's esophagus</p> <p>⑤ History of major abdominal surgery including bariatric surgery (except appendectomy and gynecological procedures)</p> <p>⑥ History of serious cardiovascular/cerebrovascular diseases</p> <p>⑦ History of liver cirrhosis (Child-Pugh <math>\geq</math>A)</p> <p>⑧ History of chronic kidney disease (estimated glomerular filtration rate) &lt;60 mL/min/1.73 m<sup>2</sup>)</p> <p>⑨ History of inflammatory bowel disease (including ulcerative colitis and Crohn's disease)</p> <p>⑩ History of chronic anemia (Hgb level &lt;100 g/L in men and &lt;90 g/L in women)</p> <p>⑪ Simultaneous surgery for cholecystectomy</p> <p>⑫ Pregnancy or desire for conception during the first year of the study period</p> <p>⑬ Uncontrolled mental and psychological disorders</p> <p>⑭ Expected survival &lt;5 years due to end-stage disease or malignant tumor</p> <p>⑮ Participation in clinical studies/trials with conflicting interest with this study</p> <p>⑯ Unwilling or unable to provide informed consent</p> |
| 15. Study Type               | <p>Interventional</p> <p>Allocation: randomised</p> <p>Intervention model: Parallel assignment</p> <p>Masking: none</p> <p>Primary purpose: treatment</p>                                                                                                                                                                                                                                                                                                                                                                                                                                                                                                                                                                                                                                                                                                                                                                                                                                                                                                                                                                                                      |
| 16. Date of First Enrollment | 6 May, 2022                                                                                                                                                                                                                                                                                                                                                                                                                                                                                                                                                                                                                                                                                                                                                                                                                                                                                                                                                                                                                                                                                                                                                    |
| 17. Sample Size              | 248                                                                                                                                                                                                                                                                                                                                                                                                                                                                                                                                                                                                                                                                                                                                                                                                                                                                                                                                                                                                                                                                                                                                                            |
| 18. Recruitment Status       | Recruiting: participants are currently being recruited and enrolled                                                                                                                                                                                                                                                                                                                                                                                                                                                                                                                                                                                                                                                                                                                                                                                                                                                                                                                                                                                                                                                                                            |
| 19. Primary Outcome(s)       | The only primary endpoint is the rate of complete diabetes remission which is defined as HbA1c $\leq$ 6.0% (42 mmol/mol) and fasting plasma glucose $\leq$ 5.6 mmol/l without any antidiabetic medications at 1 year after surgery.                                                                                                                                                                                                                                                                                                                                                                                                                                                                                                                                                                                                                                                                                                                                                                                                                                                                                                                            |
| 20. Key Secondary Outcomes   | <ul style="list-style-type: none"> <li>● HbA1c</li> <li>● Fasting and stimulated levels of plasma glucose, insulin, and C-peptide</li> <li>● Use of antidiabetic medication</li> <li>● The remission rate of microalbuminuria,</li> <li>● The progression rate of diabetic retinopathy (DR)</li> <li>● Body weight, BMI, waist and hip circumference</li> </ul>                                                                                                                                                                                                                                                                                                                                                                                                                                                                                                                                                                                                                                                                                                                                                                                                |

|                           |                                                                                                                                                                                                                                                                                                                                                                                                                                                                                                                                                                                                                                                                                                                                                                                                                                                                                                                                                                                                                                                                                                                                                                                                                                                                                                                                       |
|---------------------------|---------------------------------------------------------------------------------------------------------------------------------------------------------------------------------------------------------------------------------------------------------------------------------------------------------------------------------------------------------------------------------------------------------------------------------------------------------------------------------------------------------------------------------------------------------------------------------------------------------------------------------------------------------------------------------------------------------------------------------------------------------------------------------------------------------------------------------------------------------------------------------------------------------------------------------------------------------------------------------------------------------------------------------------------------------------------------------------------------------------------------------------------------------------------------------------------------------------------------------------------------------------------------------------------------------------------------------------|
|                           | <ul style="list-style-type: none"> <li>● Excess and total BMI loss percentage, excess and total weight loss percentage, and absolute weight loss (kg). The above outcome measures are calculated based on the optimal BMI (25 kg/m<sup>2</sup>).</li> <li>● Resting systolic and diastolic blood pressure</li> <li>● Use of anti-hypertensive medication</li> <li>● Fasting plasma lipid profile</li> <li>● Use of lipid-lowering drugs</li> <li>● Echocardiography</li> <li>● Cervical vessels and lower extremity vascular ultrasound</li> <li>● Major Adverse Cardiovascular Events (MACE) events</li> <li>● The American Diabetes Association composite triple end point</li> <li>● Gastro-oesophageal reflux disease</li> <li>● Self-reported gastrointestinal symptoms</li> <li>● Gastric and esophageal mucosa modifications as demonstrate by EGD and the following biopsy pathology</li> <li>● Hemoglobin</li> <li>● Albumin, prealbumin</li> <li>● Folic acid, ferritin, saturation coefficient, vitamin B12</li> <li>● Parathyroid hormone (PTH), vitamin D</li> <li>● Quality of life</li> <li>● Surgical and medical complications (Dindo-Clavien classification)</li> <li>● Hypoglycaemic episodes and dumping syndrome (Sigstad questionnaire)</li> <li>● Length of hospitalization</li> <li>● Readmissions</li> </ul> |
| 21. Ethics Review         | <p>Status:Approved</p> <p>Date of approval:25 January 2022</p> <p>Name and contact details of Ethics committee(s): Beijing Friendship Hospital, Capital Medical University (2021-P2-037-03)</p>                                                                                                                                                                                                                                                                                                                                                                                                                                                                                                                                                                                                                                                                                                                                                                                                                                                                                                                                                                                                                                                                                                                                       |
| 22. Completion date       | Not yet                                                                                                                                                                                                                                                                                                                                                                                                                                                                                                                                                                                                                                                                                                                                                                                                                                                                                                                                                                                                                                                                                                                                                                                                                                                                                                                               |
| 23. Summary Results       | Not yet                                                                                                                                                                                                                                                                                                                                                                                                                                                                                                                                                                                                                                                                                                                                                                                                                                                                                                                                                                                                                                                                                                                                                                                                                                                                                                                               |
| 24. IPD sharing statement | <ol style="list-style-type: none"> <li>1. Will individual deidentified participant data (including data dictionaries) will be shared: Yes</li> <li>2. what data in particular will be shared: Individual participant data that underlie the results reported in this article, after deidentification (text, tables, figures, and appendices).</li> <li>3. what other documents will be available: study protocol</li> </ol>                                                                                                                                                                                                                                                                                                                                                                                                                                                                                                                                                                                                                                                                                                                                                                                                                                                                                                           |

|  |                                                                                                                                                                                                                                                                                                                                                                                                                                                                                                                                                                               |
|--|-------------------------------------------------------------------------------------------------------------------------------------------------------------------------------------------------------------------------------------------------------------------------------------------------------------------------------------------------------------------------------------------------------------------------------------------------------------------------------------------------------------------------------------------------------------------------------|
|  | <p>4. when will data be available (start and end dates):<br/>Beginning 6 months and ending 24 months following article publication.</p> <p>5. With whom: Investigators whose proposed use of the data has been approved by an independent review committee identified for this purpose.</p> <p>6. For what types of analysis: For individual participant data meta-analysis.</p> <p>7. By what mechanism will data be made available:<br/>Proposals should be directed to zhangzht@ccmu.edu.cn to gain access, data requestors will need to sign a data access agreement.</p> |
|--|-------------------------------------------------------------------------------------------------------------------------------------------------------------------------------------------------------------------------------------------------------------------------------------------------------------------------------------------------------------------------------------------------------------------------------------------------------------------------------------------------------------------------------------------------------------------------------|
